# Supplementary material
Source: publisher figshare collection journal article supplement (https://acs.figshare.com/ndownloader/files/5465327)
Supplement: Supplementary file 1 [file 5465327]

  
data_nol122 
  
_audit_creation_method            SHELXL-97 
_chemical_name_systematic 
; 
 ? 
; 
_chemical_name_common             ? 
_chemical_melting_point           ? 
_chemical_formula_moiety          ? 
_chemical_formula_sum 
 'C14 H25 Br N2 Ni' 
_chemical_formula_weight          359.98 
  
loop_ 
 _atom_type_symbol 
 _atom_type_description 
 _atom_type_scat_dispersion_real 
 _atom_type_scat_dispersion_imag 
 _atom_type_scat_source 
 'C'  'C'   0.0033   0.0016 
 'International Tables Vol C Tables 4.2.6.8 and 6.1.1.4' 
 'H'  'H'   0.0000   0.0000 
 'International Tables Vol C Tables 4.2.6.8 and 6.1.1.4' 
 'N'  'N'   0.0061   0.0033 
 'International Tables Vol C Tables 4.2.6.8 and 6.1.1.4' 
 'Ni'  'Ni'   0.3393   1.1124 
 'International Tables Vol C Tables 4.2.6.8 and 6.1.1.4' 
 'Br'  'Br'  -0.2901   2.4595 
 'International Tables Vol C Tables 4.2.6.8 and 6.1.1.4' 
  
_symmetry_cell_setting            Orthorhombic 
_symmetry_space_group_name_H-M    Pna2(1) 
  
loop_ 
 _symmetry_equiv_pos_as_xyz 
 'x, y, z' 
 '-x, -y, z+1/2' 
 'x+1/2, -y+1/2, z' 
 '-x+1/2, y+1/2, z+1/2' 
  
_cell_length_a                    11.2997(12) 
_cell_length_b                    9.7379(11) 
_cell_length_c                    14.7603(16) 
_cell_angle_alpha                 90.00 
_cell_angle_beta                  90.00 
_cell_angle_gamma                 90.00 
_cell_volume                      1624.2(3) 
_cell_formula_units_Z             4 
_cell_measurement_temperature     150(2) 
_cell_measurement_reflns_used     13277 
_cell_measurement_theta_min       4.170 
_cell_measurement_theta_max       31.041 
  
_exptl_crystal_description        wedge 
_exptl_crystal_colour             amber 
_exptl_crystal_size_max           0.2 
_exptl_crystal_size_mid           0.5 
_exptl_crystal_size_min           0.8 
_exptl_crystal_density_meas       ? 
_exptl_crystal_density_diffrn     1.472 
_exptl_crystal_density_method     'not measured' 
_exptl_crystal_F_000              744 
_exptl_absorpt_coefficient_mu     3.641 
_exptl_absorpt_correction_type    empirical 
_exptl_absorpt_correction_T_min   0.187116 
_exptl_absorpt_correction_T_max   0.695028 
_exptl_absorpt_process_details    ? 
  
_exptl_special_details 
; 
 ? 
; 
  
_diffrn_ambient_temperature       150(2) 
_diffrn_radiation_wavelength      0.71073 
_diffrn_radiation_type            MoK\a 
_diffrn_radiation_source          'fine-focus sealed tube' 
_diffrn_radiation_monochromator   graphite 
_diffrn_measurement_device_type   'CCD area detector' 
_diffrn_measurement_method        'phi and omega scans' 
_diffrn_detector_area_resol_mean  ? 
_diffrn_standards_number          ? 
_diffrn_standards_interval_count  ? 
_diffrn_standards_interval_time   ? 
_diffrn_standards_decay_%         ? 
_diffrn_reflns_number             21792 
_diffrn_reflns_av_R_equivalents   0.1015 
_diffrn_reflns_av_sigmaI/netI     0.0655 
_diffrn_reflns_limit_h_min        -16 
_diffrn_reflns_limit_h_max        16 
_diffrn_reflns_limit_k_min        -13 
_diffrn_reflns_limit_k_max        14 
_diffrn_reflns_limit_l_min        -20 
_diffrn_reflns_limit_l_max        21 
_diffrn_reflns_theta_min          4.19 
_diffrn_reflns_theta_max          31.16 
_reflns_number_total              5026 
_reflns_number_gt                 4175 
_reflns_threshold_expression      >2sigma(I) 
  
_computing_data_collection        'Bruker SMART' 
_computing_cell_refinement        'Bruker SMART' 
_computing_data_reduction         'Bruker SHELXTL' 
_computing_structure_solution     'SHELXS-97 (Sheldrick, 1990)' 
_computing_structure_refinement   'SHELXL-97 (Sheldrick, 1997)' 
_computing_molecular_graphics     'Bruker SHELXTL' 
_computing_publication_material   'Bruker SHELXTL' 
  
_refine_special_details 
; 
 Refinement of F^2^ against ALL reflections.  The weighted R-factor wR and 
 goodness of fit S are based on F^2^, conventional R-factors R are based 
 on F, with F set to zero for negative F^2^. The threshold expression of 
 F^2^ > 2sigma(F^2^) is used only for calculating R-factors(gt) etc. and is 
 not relevant to the choice of reflections for refinement.  R-factors based 
 on F^2^ are statistically about twice as large as those based on F, and R- 
 factors based on ALL data will be even larger. 
; 
  
_refine_ls_structure_factor_coef  Fsqd 
_refine_ls_matrix_type            full 
_refine_ls_weighting_scheme       calc 
_refine_ls_weighting_details 
 'calc w=1/[\s^2^(Fo^2^)+(0.0931P)^2^+0.0828P] where P=(Fo^2^+2Fc^2^)/3' 
_atom_sites_solution_primary      direct 
_atom_sites_solution_secondary    difmap 
_atom_sites_solution_hydrogens    geom 
_refine_ls_hydrogen_treatment     mixed 
_refine_ls_extinction_method      none 
_refine_ls_extinction_coef        ? 
_refine_ls_abs_structure_details 
 'Flack H D (1983), Acta Cryst. A39, 876-881' 
_refine_ls_abs_structure_Flack    0.046(14) 
_refine_ls_number_reflns          5026 
_refine_ls_number_parameters      263 
_refine_ls_number_restraints      627 
_refine_ls_R_factor_all           0.0724 
_refine_ls_R_factor_gt            0.0569 
_refine_ls_wR_factor_ref          0.1463 
_refine_ls_wR_factor_gt           0.1379 
_refine_ls_goodness_of_fit_ref    1.044 
_refine_ls_restrained_S_all       0.991 
_refine_ls_shift/su_max           0.084 
_refine_ls_shift/su_mean          0.005 
  
loop_ 
 _atom_site_label 
 _atom_site_type_symbol 
 _atom_site_fract_x 
 _atom_site_fract_y 
 _atom_site_fract_z 
 _atom_site_U_iso_or_equiv 
 _atom_site_adp_type 
 _atom_site_occupancy 
 _atom_site_symmetry_multiplicity 
 _atom_site_calc_flag 
 _atom_site_refinement_flags 
 _atom_site_disorder_assembly 
 _atom_site_disorder_group 
Br1 Br 0.40127(4) 0.59776(4) 0.66662(4) 0.02598(12) Uani 1 1 d U . . 
Ni1 Ni 0.25015(5) 0.60935(5) 0.55291(4) 0.01947(13) Uani 1 1 d U . . 
C1 C 0.2215(3) 0.4119(4) 0.5414(3) 0.0171(7) Uani 1 1 d DU . . 
N2 N 0.2705(3) 0.3220(4) 0.4805(2) 0.0196(7) Uani 1 1 d DU . . 
C3 C 0.2293(4) 0.1881(5) 0.4979(3) 0.0270(9) Uani 1 1 d DU . . 
H3 H 0.243(4) 0.140(9) 0.477(3) 0.08(4) Uiso 1 1 d D . . 
C4 C 0.1557(4) 0.1941(4) 0.5689(3) 0.0274(9) Uani 1 1 d DU . . 
H4 H 0.131(4) 0.148(8) 0.585(4) 0.09(3) Uiso 1 1 d D . . 
N5 N 0.1499(3) 0.3320(3) 0.5967(2) 0.0188(7) Uani 1 1 d DU . . 
C6 C 0.3502(4) 0.3540(4) 0.4006(3) 0.0233(8) Uani 1 1 d DU . . 
C7 C 0.4285(4) 0.4819(4) 0.4202(3) 0.0235(9) Uani 1 1 d DU . . 
H7A H 0.3806(19) 0.5634(19) 0.426(2) 0.012(11) Uiso 1 1 d D . . 
H7B H 0.472(2) 0.472(3) 0.4759(15) 0.010(10) Uiso 1 1 d D . . 
H7C H 0.485(2) 0.498(3) 0.3725(16) 0.052(18) Uiso 1 1 d D . . 
C8 C 0.4353(5) 0.2304(5) 0.3858(4) 0.0368(12) Uani 1 1 d DU . . 
H8A H 0.473(4) 0.202(4) 0.4414(14) 0.06(2) Uiso 1 1 d D . . 
H8B H 0.498(3) 0.253(3) 0.344(3) 0.047(19) Uiso 1 1 d D . . 
H8C H 0.394(2) 0.152(3) 0.361(3) 0.11(4) Uiso 1 1 d D . . 
C9 C 0.2734(5) 0.3760(7) 0.3168(4) 0.0403(13) Uani 1 1 d DU . . 
H9A H 0.216(2) 0.450(3) 0.3236(17) 0.008(10) Uiso 1 1 d D . . 
H9B H 0.227(3) 0.297(2) 0.300(2) 0.028(15) Uiso 1 1 d D . . 
H9C H 0.319(2) 0.400(4) 0.2633(13) 0.06(2) Uiso 1 1 d D . . 
C10 C 0.0802(4) 0.3742(4) 0.6789(3) 0.0233(9) Uani 1 1 d DU . . 
C11 C -0.0364(4) 0.2918(6) 0.6839(4) 0.0426(15) Uani 1 1 d DU . . 
H11A H -0.022(2) 0.195(2) 0.696(4) 0.08(3) Uiso 1 1 d D . . 
H11B H -0.089(2) 0.323(4) 0.731(2) 0.023(14) Uiso 1 1 d D . . 
H11C H -0.081(3) 0.294(5) 0.6279(16) 0.09(3) Uiso 1 1 d D . . 
C12 C 0.1576(5) 0.3463(6) 0.7625(3) 0.0349(12) Uani 1 1 d DU . . 
H12A H 0.231(2) 0.398(4) 0.763(2) 0.05(2) Uiso 1 1 d D . . 
H12C H 0.117(2) 0.369(4) 0.8184(12) 0.033(15) Uiso 1 1 d D . . 
H12B H 0.179(4) 0.2502(19) 0.768(2) 0.07(2) Uiso 1 1 d D . . 
C13 C 0.0483(4) 0.5275(4) 0.6748(4) 0.0300(9) Uani 1 1 d DU . . 
H13B H -0.003(3) 0.555(2) 0.724(2) 0.019(12) Uiso 1 1 d D . . 
H13A H 0.1169(18) 0.587(2) 0.677(3) 0.06(2) Uiso 1 1 d D . . 
H13C H 0.008(4) 0.552(3) 0.6191(18) 0.039(17) Uiso 1 1 d D . . 
C14 C 0.2642(7) 0.8225(5) 0.5367(5) 0.0454(15) Uani 1 1 d DU . . 
H14A H 0.331(6) 0.80(2) 0.499(10) 0.33(12) Uiso 1 1 d D . . 
H14B H 0.279(4) 0.881(5) 0.587(3) 0.024(15) Uiso 1 1 d D . . 
C15 C 0.1557(6) 0.7735(5) 0.5187(4) 0.0431(13) Uani 1 1 d DU . . 
H15 H 0.076(6) 0.804(7) 0.563(5) 0.08(3) Uiso 1 1 d D . . 
C16 C 0.1332(5) 0.6664(6) 0.4565(4) 0.0380(11) Uani 1 1 d DU . . 
H16A H 0.055(3) 0.630(5) 0.456(3) 0.022(13) Uiso 1 1 d D . . 
H16B H 0.169(8) 0.675(7) 0.399(3) 0.11(3) Uiso 1 1 d D . . 
  
loop_ 
 _atom_site_aniso_label 
 _atom_site_aniso_U_11 
 _atom_site_aniso_U_22 
 _atom_site_aniso_U_33 
 _atom_site_aniso_U_23 
 _atom_site_aniso_U_13 
 _atom_site_aniso_U_12 
Br1 0.0275(2) 0.02535(18) 0.0251(2) -0.0044(2) -0.0045(2) -0.00305(14) 
Ni1 0.0240(3) 0.0151(2) 0.0193(3) 0.0001(2) -0.0007(2) -0.00024(18) 
C1 0.0219(18) 0.0196(15) 0.0098(18) 0.0009(15) -0.0004(14) -0.0034(12) 
N2 0.0221(16) 0.0199(14) 0.0169(17) -0.0046(13) 0.0029(12) -0.0041(12) 
C3 0.037(2) 0.0146(16) 0.030(2) -0.0053(18) 0.0079(18) -0.0030(16) 
C4 0.035(2) 0.0154(15) 0.031(2) -0.0027(17) 0.0028(18) -0.0066(16) 
N5 0.0235(17) 0.0172(14) 0.0157(16) -0.0031(13) 0.0010(13) -0.0037(12) 
C6 0.027(2) 0.0234(17) 0.0198(19) -0.0059(16) 0.0039(15) -0.0046(15) 
C7 0.0194(18) 0.0235(18) 0.028(2) -0.0030(17) 0.0069(15) -0.0016(15) 
C8 0.037(3) 0.025(2) 0.049(3) -0.013(2) 0.016(2) -0.0025(18) 
C9 0.036(3) 0.061(4) 0.023(2) -0.001(2) 0.000(2) -0.012(3) 
C10 0.0212(18) 0.0256(17) 0.023(3) -0.0069(18) 0.0040(15) -0.0012(13) 
C11 0.029(2) 0.049(3) 0.050(4) -0.016(3) 0.018(2) -0.021(2) 
C12 0.043(3) 0.047(3) 0.016(2) 0.005(2) 0.0040(18) 0.009(2) 
C13 0.035(2) 0.0307(18) 0.025(2) -0.006(2) 0.009(2) 0.0075(17) 
C14 0.070(4) 0.0161(18) 0.050(4) 0.006(2) -0.005(3) 0.002(2) 
C15 0.050(3) 0.028(2) 0.052(3) 0.011(2) -0.001(2) 0.013(2) 
C16 0.039(3) 0.040(3) 0.035(3) 0.011(2) -0.006(2) 0.002(2) 
  
_geom_special_details 
; 
 All esds (except the esd in the dihedral angle between two l.s. planes) 
 are estimated using the full covariance matrix.  The cell esds are taken 
 into account individually in the estimation of esds in distances, angles 
 and torsion angles; correlations between esds in cell parameters are only 
 used when they are defined by crystal symmetry.  An approximate (isotropic) 
 treatment of cell esds is used for estimating esds involving l.s. planes. 
; 
  
loop_ 
 _geom_bond_atom_site_label_1 
 _geom_bond_atom_site_label_2 
 _geom_bond_distance 
 _geom_bond_site_symmetry_2 
 _geom_bond_publ_flag 
Br1 Ni1 2.3970(8) . ? 
Ni1 C1 1.957(4) . ? 
Ni1 C15 1.987(5) . ? 
Ni1 C16 2.021(5) . ? 
Ni1 C14 2.096(5) . ? 
C1 N2 1.371(5) . ? 
C1 N5 1.389(5) . ? 
N2 C3 1.407(6) . ? 
N2 C6 1.517(6) . ? 
C3 C4 1.339(7) . ? 
C4 N5 1.405(5) . ? 
N5 C10 1.503(6) . ? 
C6 C9 1.526(7) . ? 
C6 C7 1.555(6) . ? 
C6 C8 1.556(6) . ? 
C10 C13 1.537(6) . ? 
C10 C12 1.538(7) . ? 
C10 C11 1.545(6) . ? 
C14 C15 1.342(9) . ? 
C15 C16 1.413(9) . ? 
  
loop_ 
 _geom_angle_atom_site_label_1 
 _geom_angle_atom_site_label_2 
 _geom_angle_atom_site_label_3 
 _geom_angle 
 _geom_angle_site_symmetry_1 
 _geom_angle_site_symmetry_3 
 _geom_angle_publ_flag 
C1 Ni1 C15 132.8(2) . . ? 
C1 Ni1 C16 95.8(2) . . ? 
C15 Ni1 C16 41.3(3) . . ? 
C1 Ni1 C14 167.4(2) . . ? 
C15 Ni1 C14 38.3(3) . . ? 
C16 Ni1 C14 72.4(3) . . ? 
C1 Ni1 Br1 97.61(11) . . ? 
C15 Ni1 Br1 126.76(19) . . ? 
C16 Ni1 Br1 166.49(17) . . ? 
C14 Ni1 Br1 94.2(2) . . ? 
N2 C1 N5 105.2(3) . . ? 
N2 C1 Ni1 128.2(3) . . ? 
N5 C1 Ni1 126.6(3) . . ? 
C1 N2 C3 109.8(4) . . ? 
C1 N2 C6 128.1(3) . . ? 
C3 N2 C6 121.9(4) . . ? 
C4 C3 N2 107.9(4) . . ? 
C3 C4 N5 107.4(4) . . ? 
C1 N5 C4 109.7(4) . . ? 
C1 N5 C10 128.8(3) . . ? 
C4 N5 C10 121.4(4) . . ? 
N2 C6 C9 108.8(4) . . ? 
N2 C6 C7 111.0(3) . . ? 
C9 C6 C7 111.2(4) . . ? 
N2 C6 C8 108.5(4) . . ? 
C9 C6 C8 110.3(4) . . ? 
C7 C6 C8 107.1(4) . . ? 
N5 C10 C13 110.9(4) . . ? 
N5 C10 C12 107.6(3) . . ? 
C13 C10 C12 109.6(4) . . ? 
N5 C10 C11 110.1(4) . . ? 
C13 C10 C11 107.8(4) . . ? 
C12 C10 C11 110.8(4) . . ? 
C15 C14 Ni1 66.5(3) . . ? 
C14 C15 C16 123.8(6) . . ? 
C14 C15 Ni1 75.2(3) . . ? 
C16 C15 Ni1 70.6(3) . . ? 
C15 C16 Ni1 68.1(3) . . ? 
  
loop_ 
 _geom_torsion_atom_site_label_1 
 _geom_torsion_atom_site_label_2 
 _geom_torsion_atom_site_label_3 
 _geom_torsion_atom_site_label_4 
 _geom_torsion 
 _geom_torsion_site_symmetry_1 
 _geom_torsion_site_symmetry_2 
 _geom_torsion_site_symmetry_3 
 _geom_torsion_site_symmetry_4 
 _geom_torsion_publ_flag 
C15 Ni1 C1 N2 104.5(4) . . . . ? 
C16 Ni1 C1 N2 83.8(3) . . . . ? 
C14 Ni1 C1 N2 64.0(12) . . . . ? 
Br1 Ni1 C1 N2 -94.4(3) . . . . ? 
C15 Ni1 C1 N5 -78.5(4) . . . . ? 
C16 Ni1 C1 N5 -99.2(3) . . . . ? 
C14 Ni1 C1 N5 -119.0(11) . . . . ? 
Br1 Ni1 C1 N5 82.6(3) . . . . ? 
N5 C1 N2 C3 0.2(2) . . . . ? 
Ni1 C1 N2 C3 177.7(3) . . . . ? 
N5 C1 N2 C6 176.0(3) . . . . ? 
Ni1 C1 N2 C6 -6.6(5) . . . . ? 
C1 N2 C3 C4 -0.2(2) . . . . ? 
C6 N2 C3 C4 -176.3(3) . . . . ? 
N2 C3 C4 N5 0.09(19) . . . . ? 
N2 C1 N5 C4 -0.2(2) . . . . ? 
Ni1 C1 N5 C4 -177.7(3) . . . . ? 
N2 C1 N5 C10 175.9(4) . . . . ? 
Ni1 C1 N5 C10 -1.6(5) . . . . ? 
C3 C4 N5 C1 0.1(2) . . . . ? 
C3 C4 N5 C10 -176.4(3) . . . . ? 
C1 N2 C6 C9 -91.0(5) . . . . ? 
C3 N2 C6 C9 84.3(4) . . . . ? 
C1 N2 C6 C7 31.6(5) . . . . ? 
C3 N2 C6 C7 -153.1(3) . . . . ? 
C1 N2 C6 C8 149.0(4) . . . . ? 
C3 N2 C6 C8 -35.7(5) . . . . ? 
C1 N5 C10 C13 25.9(5) . . . . ? 
C4 N5 C10 C13 -158.4(3) . . . . ? 
C1 N5 C10 C12 -94.0(4) . . . . ? 
C4 N5 C10 C12 81.7(4) . . . . ? 
C1 N5 C10 C11 145.2(4) . . . . ? 
C4 N5 C10 C11 -39.1(5) . . . . ? 
C1 Ni1 C14 C15 50.2(13) . . . . ? 
C16 Ni1 C14 C15 29.5(4) . . . . ? 
Br1 Ni1 C14 C15 -151.2(4) . . . . ? 
Ni1 C14 C15 C16 -53.9(5) . . . . ? 
C1 Ni1 C15 C14 -166.7(4) . . . . ? 
C16 Ni1 C15 C14 -134.6(6) . . . . ? 
Br1 Ni1 C15 C14 36.8(5) . . . . ? 
C1 Ni1 C15 C16 -32.2(5) . . . . ? 
C14 Ni1 C15 C16 134.6(6) . . . . ? 
Br1 Ni1 C15 C16 171.4(3) . . . . ? 
C14 C15 C16 Ni1 55.9(6) . . . . ? 
C1 Ni1 C16 C15 156.9(4) . . . . ? 
C14 Ni1 C16 C15 -27.6(4) . . . . ? 
Br1 Ni1 C16 C15 -30.8(10) . . . . ? 
  
_diffrn_measured_fraction_theta_max    0.975 
_diffrn_reflns_theta_full              31.16 
_diffrn_measured_fraction_theta_full   0.975 
_refine_diff_density_max    1.092 
_refine_diff_density_min   -1.280 
_refine_diff_density_rms    0.141 
  
